# Supplementary material for: A 6-Month Open-Label Extension Study of Vortioxetine in Pediatric Patients with Depressive or Anxiety Disorders
Source: PubMed Central journal article supplement — J Child Adolesc Psychopharmacol. 2018 Feb 1;28(1):47–54. doi: 10.1089/cap.2017.0047 (PMC5771527; doi:10.1089/cap.2017.0047), 2018-02-01
Supplement: Supp_Table1.pdf [file Supp_Table1.pdf]

## Supplementary Data

SUPPLEMENTARY TABLE S1. MEDICATIONS DISCONTINUED  
BEFORE FIRST DOSE OF LEAD-IN PERIOD

---

|                                                 | <i>Total (N=41)</i> |
|-------------------------------------------------|---------------------|
| Patients discontinuing medication, <i>n</i> (%) | 17 (41)             |
| Ibuprofen                                       | 3 (7)               |
| Sertraline hydrochloride                        | 3 (7)               |
| Citalopram                                      | 2 (5)               |
| Fluoxetine hydrochloride                        | 2 (5)               |
| Paracetamol                                     | 2 (5)               |
| Paroxetine                                      | 2 (5)               |
| Citalopram hydrobromide                         | 1 (2)               |
| Dexamethasone                                   | 1 (2)               |
| Diphenhydramine hydrochloride                   | 1 (2)               |
| Doxycycline                                     | 1 (2)               |
| Escitalopram oxalate                            | 1 (2)               |
| Guanfacine hydrochloride                        | 1 (2)               |
| Methylphenidate hydrochloride                   | 1 (2)               |
| Mixed amphetamine salts                         | 1 (2)               |
| Naproxen sodium                                 | 1 (2)               |
| Nefazodone                                      | 1 (2)               |
| Ofloxacin                                       | 1 (2)               |
| Prednisone                                      | 1 (2)               |
| Progesterone                                    | 1 (2)               |
| Pseudoephedrine and loratadine                  | 1 (2)               |

---
