# Supplementary material for: A 6-Month Open-Label Extension Study of Vortioxetine in Pediatric Patients with Depressive or Anxiety Disorders
Source: PubMed Central journal article supplement — J Child Adolesc Psychopharmacol. 2018 Feb 1;28(1):47–54. doi: 10.1089/cap.2017.0047 (PMC5771527; doi:10.1089/cap.2017.0047), 2018-02-01
Supplement: Supp_Table2.pdf [file Supp_Table2.pdf]

SUPPLEMENTARY TABLE S2. COMORBID PSYCHIATRIC DISORDERS

|                                                  | <i>Total (N=41)</i> |
|--------------------------------------------------|---------------------|
| Patients with concurrent disorders, <i>n</i> (%) | 32 (78)             |
| Attention-deficit/hyperactivity disorder         | 17 (41)             |
| Borderline personality disorder                  | 1 (2)               |
| Eating disorder                                  | 1 (2)               |
| Oppositional defiant disorder                    | 1 (2)               |
